# Supplementary material
Source: PubMed Central journal article supplement (PMC5985335)
Supplement: mmc1.pdf [file mmc1.pdf]

**Supplemental Data**

***LTBP3* Pathogenic Variants Predispose Individuals  
to Thoracic Aortic Aneurysms and Dissections**

**Dong-chuan Guo, Ellen S. Regalado, Amelie Pinard, Jiyuan Chen, Kwanghyuk Lee, Christina Rigelsky, Lior Zilberberg, Ellen M. Hostetler, Micheala Aldred, Stephanie E. Wallace, Siddharth K. Prakash, University of Washington Center for Mendelian Genomics, Suzanne M. Leal, Michael J. Bamshad, Deborah A. Nickerson, Marvin Natowicz, Daniel B. Rifkin, and Dianna M. Milewicz**

Table S1. Rare *LTBP3* Variants Identified in Individuals with Early-Onset of Thoracic Aortic Dissection

| Individual ID | Aa alt     | Sex | Race <sup>a</sup> | Age onset TAD <sup>b</sup> | PhastCons | PolyPhen2 | CADD | gnomAD MAF | Pathogenic variant in another HTAD gene |
|---------------|------------|-----|-------------------|----------------------------|-----------|-----------|------|------------|-----------------------------------------|
| 1             | Ala25del   | M   | EA                | 48                         | 0.996     | na        | na   | 0          | No                                      |
| 2             | Ala25del   | F   | EA                | 55                         | 0.996     | na        | na   | 0          | No                                      |
| 3             | P45Rfs*25  | M   | EA                | 50                         | 0.995     | na        | na   | 0          | No                                      |
| 4             | Glu1257Asp | M   | EA                | 48                         | 1         | 1         | 29.4 | 0          | No                                      |
| 5             | Ser1200Asn | M   | AA                | 49                         | 0.9       | 0.997     | 23.4 | 0.00046    | <i>COL3A1</i> , p.Glu360Arg             |
| 6             | Ser1200Asn | M   | AA                | 53                         | 0.9       | 0.997     | 23.4 | 0.00046    | No                                      |
| 7             | Tyr1020Cys | M   | AA                | 52                         | 1         | 1         | 26.5 | 0          | No                                      |
| 8             | Asp820Asn  | M   | EA                | 46                         | 1         | 0.996     | 23.8 | 0.00035    | No                                      |
| 9             | Pro517Leu  | M   | EA                | 46                         | 0.996     | 0.538     | 24.5 | 0.00023    | No                                      |

<sup>a</sup>EA, European American; AA, African American. <sup>b</sup>TAD, thoracic aortic dissection.
